# Supplementary material
Source: publisher figshare collection journal article supplement (https://frontiersin.figshare.com/ndownloader/files/12884567)
Supplement: Supplementary file 1 [file 12884567]

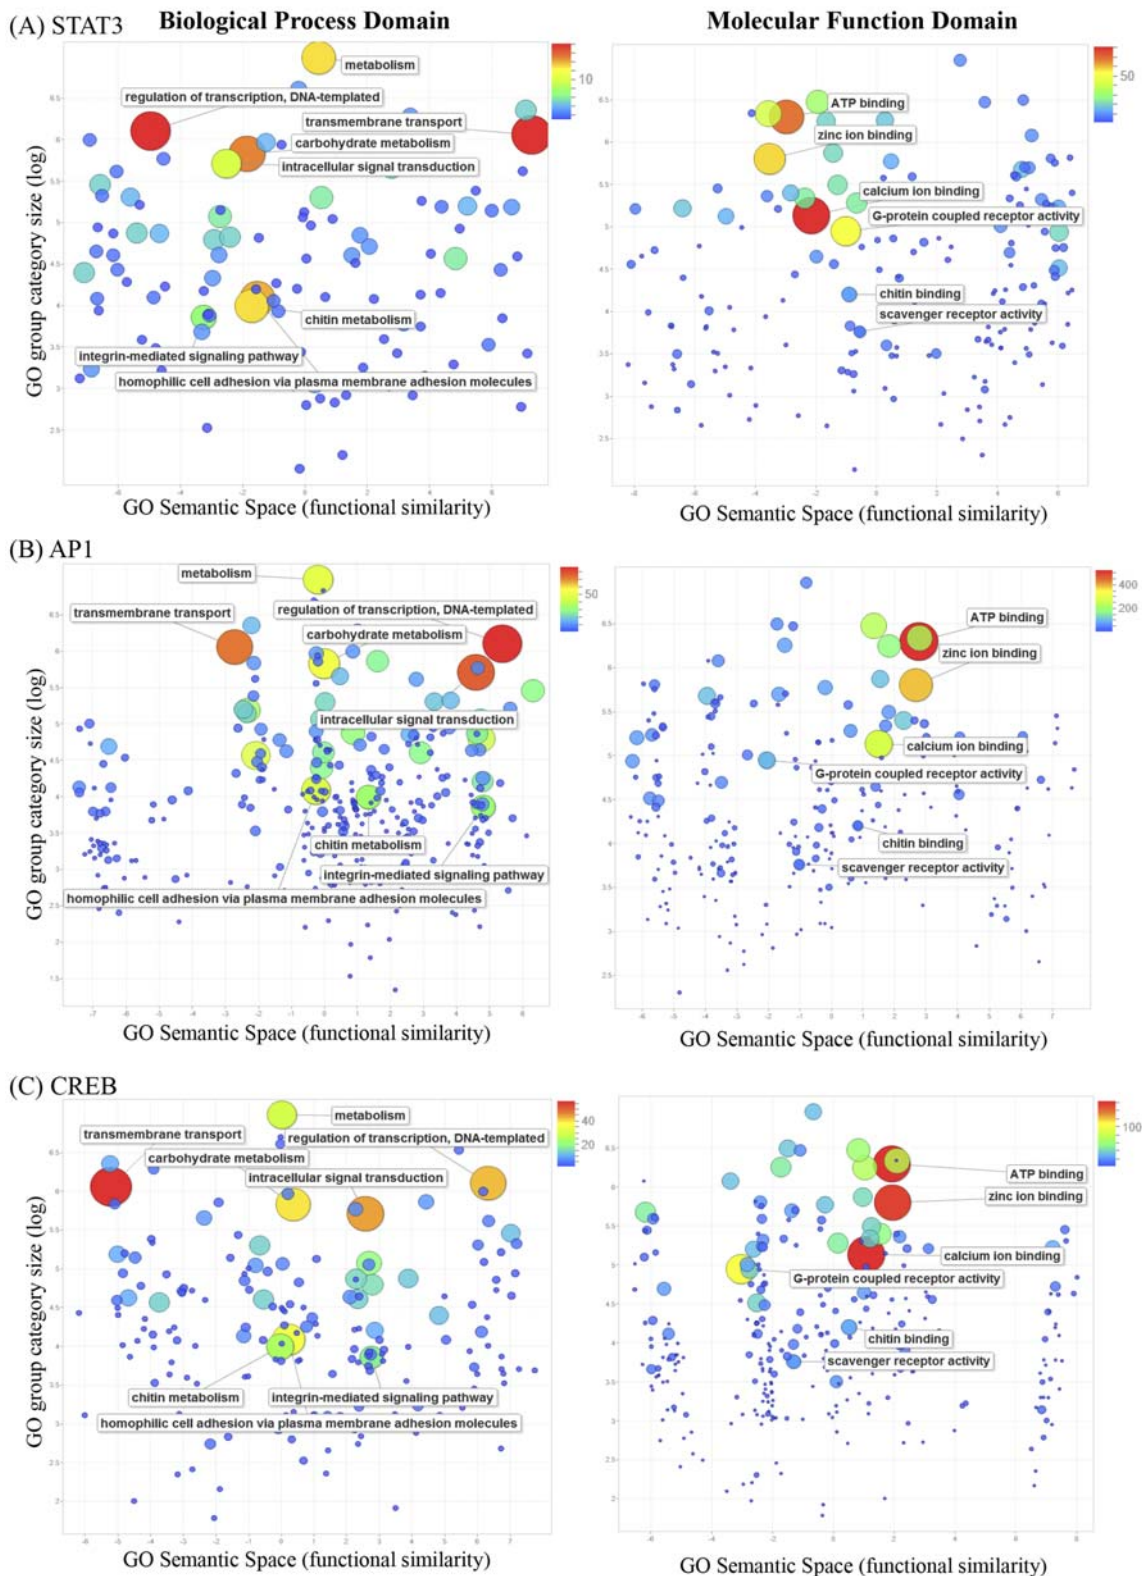

Supplementary Figure 1. REVIGO plots for biological process domain (left) and molecular function domain (right) for the focal transcription factors (A) STAT3, (B) API, and (C) CREB. The REVIGO plots show GO group size from this study (as the bubble size) as it relates to GO group category size (Y-axis) and overall GO semantic similarity (X-axis). GO groups referenced in text are identified in each panel.
